- blockade during spinal anesthesia. *ANESTHESIOLOGY* 65:139-143, 1986
2. Arndt JO, Hock A, Stanton-Hicks M, Stuhmeier KD: Peridural anesthesia and the distribution of blood in supine humans. *ANESTHESIOLOGY* 63:616-623, 1985
  3. Bonica JJ, Berges PV, Morikawa K: Circulatory effects of peridural block. *ANESTHESIOLOGY* 33:619-626, 1970
  4. Green NM: Physiology of spinal anesthesia. Baltimore, Williams and Williams, 1981, pp 64-69
  5. Bengtsson TI: Changes in skin blood flow and temperature during spinal analgesia evaluated by laser doppler flowmetry and infrared thermography. *Acta Anaesthesiol Scand* 28:625-630, 1984

(Accepted for publication November 12, 1986.)

Anesthesiology  
66:447, 1987

### Elastic Foamed Polymer Earplug as a Stethoscope Earpiece

*To the Editor:*—A precordial or esophageal stethoscope has been considered to be a fundamental monitor in pediatric anesthesia. A monaural earpiece is more comfortable than a binaural headpiece. However, unless custom-molded, the earpiece is often not used during a long operation because of discomfort.

I have found that an elastic foamed polymer earplug (Ear Whisper™, Cabot Corporation) and a disposable iv extension tube made a very comfortable earpiece, even for a long use.

The earplug is cut short, and a male adapter of an iv extension tube is inserted into the plug (fig. 1). The plug-earpiece is compressed and inserted into the auditory canal, then the earplug expands slowly in the canal and seals the space.

Since the introduction of the elastic foamed polymer earplug-earpiece, no residents have complained about discomfort of the ear.

MASAO YAMASHITA, M.D.  
*Anesthetist-in-Chief*

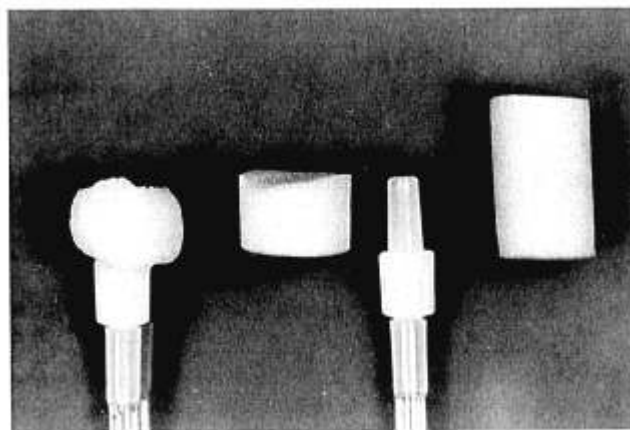

FIG. 1. Ear plug and iv extension tube make a comfortable earpiece.

Ibaraki Children's Hospital  
Mito, 311-41, Japan

(Accepted for publication November 17, 1986.)

Anesthesiology  
66:447-448, 1987

### N<sub>2</sub>O Has No Place During Oropharyngeal and Laryngotracheal Procedures

*To the Editor:*—We read with interest the clinical report entitled "Endotracheal Tube Fire Ignited by Pharyngeal Electrocautery," by Simpson and Wolf,<sup>1</sup> and we agree with their concern regarding the use of intraoral or pharyngeal electrocautery. However, we feel they missed an important opportunity to warn others and emphasize the danger when using electrocautery or laser with N<sub>2</sub>O/O<sub>2</sub> combinations during upper airway procedures. Although the beneficial effect of decreasing the O<sub>2</sub> concentration in N<sub>2</sub> has not been studied in a controlled fashion with electrocautery, we feel the specific energy ignition source (electrocautery or laser) is of secondary importance to the

avoidance of N<sub>2</sub>O and the use of a low O<sub>2</sub> percentage in N<sub>2</sub>.

El-Baz *et al.*,<sup>2</sup> investigating catheter ignition by laser during the use of O<sub>2</sub>-N<sub>2</sub> and O<sub>2</sub>-N<sub>2</sub>O mixtures, noted the critical O<sub>2</sub> concentration in N<sub>2</sub> which avoided PVC tube ignition by laser to be an FI<sub>O<sub>2</sub></sub> of 30%. Although the use of O<sub>2</sub> concentrations above the critical level of 30% may be required to provide adequate oxygenation in patients with coincident pulmonary disease, the majority of those presenting for elective airway procedures should tolerate 25-30% O<sub>2</sub> in N<sub>2</sub>. Whether individual clinicians use cuffed endotracheal tubes in children or not, or avoid the
